# Supplementary material for: Evaluating In Silico the Potential Health and Environmental Benefits of Houseplant Volatile Organic Compounds for an Emerging ‘Indoor Forest Bathing’ Approach
Source: MDPI journal article supplement (doi:10.3390/ijerph19010273), 2021-12-27
Supplement: s1 [file s1]

## Supporting Information

# Evaluating *in silico* the Potential Health and Environmental Benefits of Houseplant Volatile organic Compounds for an Emerging 'Indoor Forest Bathing' Approach

Valentina Roviello <sup>1,\*</sup>, Pasqualina Liana Scognamiglio <sup>2</sup>, Ugo Caruso <sup>3</sup>, Caterina Vicidomini <sup>4</sup>, and Giovanni N. Roviello <sup>4,\*</sup>

- 1 Department of Chemical, Materials and Industrial Production Engineering (DICMaPI), University of Naples Federico II, Piazzale V. Tecchio 80, 80125 Naples, Italy; valentina.roviello@unina.it
- 2 Center for Advanced Biomaterial for Health Care (CABHC), Istituto Italiano di Tecnologia, I-80125 Naples, Italy; pasqualina.scognamiglio@iit.it
- 3 Department of Chemical Sciences, University of Naples Federico II, Via Cintia 21, 80126 Naples, Italy; ugo.caruso@unina.it
- 4 Istituto di Biostrutture e Bioimmagini IBB-CNR; via Tommaso De Amicis 95, I-80145 Naples, Italy; giroviel@unina.it

The chemico-physical and pharmacokinetic properties predictions (performed by SwissADME online program, <http://www.swissadme.ch/index.php> accessed on 17th November 2021) for compounds 1–15 (Table 1) are reported below.

### $\alpha$ -farnesene

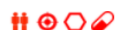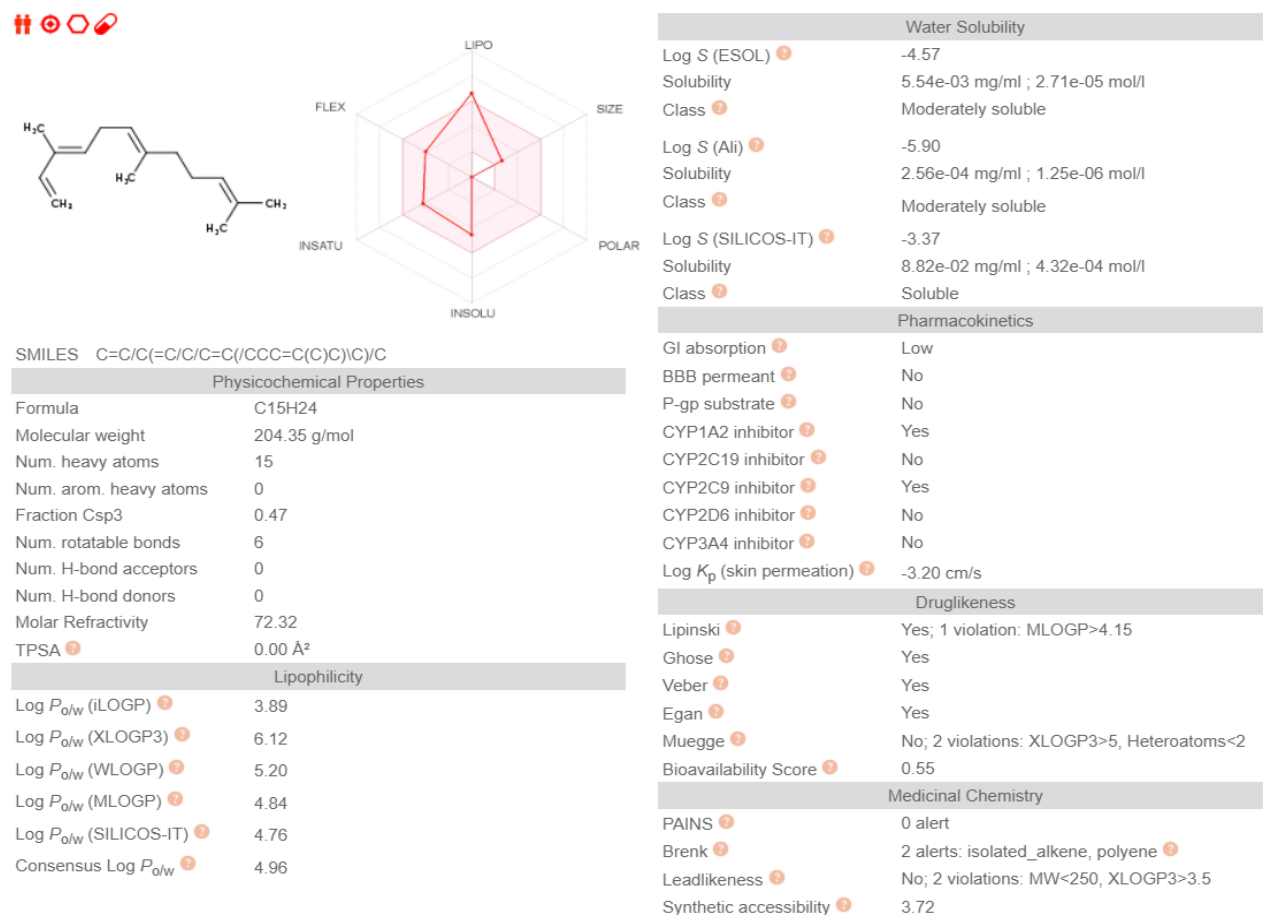

**Figure S1** Chemico-physical and pharmacokinetic properties predicted for  $\alpha$ -farnesene.

## (Z)- $\beta$ -farnesene

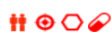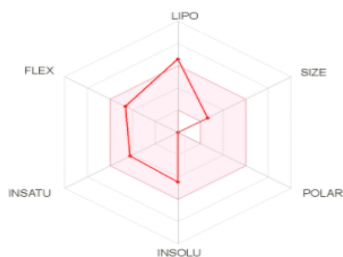

SMILES C=CC(=C)CC/C=C/C(=C)C(C)C

### Physicochemical Properties

|                           |                                 |
|---------------------------|---------------------------------|
| Formula                   | C <sub>15</sub> H <sub>24</sub> |
| Molecular weight          | 204.35 g/mol                    |
| Num. heavy atoms          | 15                              |
| Num. arom. heavy atoms    | 0                               |
| Fraction Csp <sup>3</sup> | 0.47                            |
| Num. rotatable bonds      | 7                               |
| Num. H-bond acceptors     | 0                               |
| Num. H-bond donors        | 0                               |
| Molar Refractivity        | 72.32                           |
| TPSA                      | 0.00 Å <sup>2</sup>             |

### Lipophilicity

|                                         |      |
|-----------------------------------------|------|
| Log <i>P</i> <sub>ow</sub> (iLOGP)      | 3.86 |
| Log <i>P</i> <sub>ow</sub> (XLOGP3)     | 6.03 |
| Log <i>P</i> <sub>ow</sub> (WLOGP)      | 5.20 |
| Log <i>P</i> <sub>ow</sub> (MLOGP)      | 4.84 |
| Log <i>P</i> <sub>ow</sub> (SILICOS-IT) | 4.93 |
| Consensus Log <i>P</i> <sub>ow</sub>    | 4.97 |

| Water Solubility                            |                                           |
|---------------------------------------------|-------------------------------------------|
| Log S (ESOL)                                | -4.44                                     |
| Solubility                                  | 7.35e-03 mg/ml ; 3.60e-05 mol/l           |
| Class                                       | Moderately soluble                        |
| Log S (Ali)                                 | -5.81                                     |
| Solubility                                  | 3.18e-04 mg/ml ; 1.55e-06 mol/l           |
| Class                                       | Moderately soluble                        |
| Log S (SILICOS-IT)                          | -3.74                                     |
| Solubility                                  | 3.73e-02 mg/ml ; 1.82e-04 mol/l           |
| Class                                       | Soluble                                   |
| Pharmacokinetics                            |                                           |
| GI absorption                               | Low                                       |
| BBB permeant                                | No                                        |
| P-gp substrate                              | No                                        |
| CYP1A2 inhibitor                            | Yes                                       |
| CYP2C19 inhibitor                           | No                                        |
| CYP2C9 inhibitor                            | Yes                                       |
| CYP2D6 inhibitor                            | No                                        |
| CYP3A4 inhibitor                            | No                                        |
| Log <i>K</i> <sub>p</sub> (skin permeation) | -3.27 cm/s                                |
| Druglikeness                                |                                           |
| Lipinski                                    | Yes; 1 violation: MLOGP>4.15              |
| Ghose                                       | Yes                                       |
| Veber                                       | Yes                                       |
| Egan                                        | Yes                                       |
| Muegge                                      | No; 2 violations: XLOGP3>5, Heteroatoms<2 |
| Bioavailability Score                       | 0.55                                      |
| Medicinal Chemistry                         |                                           |
| PAINS                                       | 0 alert                                   |
| Brenk                                       | 2 alerts: isolated_alkene, polyene        |
| Leadlikeness                                | No; 2 violations: MW<250, XLOGP3>3.5      |
| Synthetic accessibility                     | 3.42                                      |

Figure S2 Chemico-physical and pharmacokinetic properties predicted for (Z)- $\beta$ -farnesene.

## $\beta$ -costol

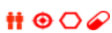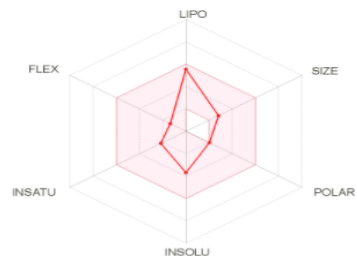

SMILES OCC(=C)C1CCC2C(C1)C(=C)CCC2)C

### Physicochemical Properties

|                           |                                   |
|---------------------------|-----------------------------------|
| Formula                   | C <sub>15</sub> H <sub>24</sub> O |
| Molecular weight          | 220.35 g/mol                      |
| Num. heavy atoms          | 16                                |
| Num. arom. heavy atoms    | 0                                 |
| Fraction Csp <sup>3</sup> | 0.73                              |
| Num. rotatable bonds      | 2                                 |
| Num. H-bond acceptors     | 1                                 |
| Num. H-bond donors        | 1                                 |
| Molar Refractivity        | 69.94                             |
| TPSA                      | 20.23 Å <sup>2</sup>              |

### Lipophilicity

|                                         |      |
|-----------------------------------------|------|
| Log <i>P</i> <sub>ow</sub> (iLOGP)      | 3.05 |
| Log <i>P</i> <sub>ow</sub> (XLOGP3)     | 4.19 |
| Log <i>P</i> <sub>ow</sub> (WLOGP)      | 3.70 |
| Log <i>P</i> <sub>ow</sub> (MLOGP)      | 3.56 |
| Log <i>P</i> <sub>ow</sub> (SILICOS-IT) | 3.80 |
| Consensus Log <i>P</i> <sub>ow</sub>    | 3.66 |

| Water Solubility                            |                                      |
|---------------------------------------------|--------------------------------------|
| Log S (ESOL)                                | -3.71                                |
| Solubility                                  | 4.26e-02 mg/ml ; 1.93e-04 mol/l      |
| Class                                       | Soluble                              |
| Log S (Ali)                                 | -4.32                                |
| Solubility                                  | 1.05e-02 mg/ml ; 4.74e-05 mol/l      |
| Class                                       | Moderately soluble                   |
| Log S (SILICOS-IT)                          | -3.24                                |
| Solubility                                  | 1.27e-01 mg/ml ; 5.74e-04 mol/l      |
| Class                                       | Soluble                              |
| Pharmacokinetics                            |                                      |
| GI absorption                               | High                                 |
| BBB permeant                                | Yes                                  |
| P-gp substrate                              | No                                   |
| CYP1A2 inhibitor                            | No                                   |
| CYP2C19 inhibitor                           | Yes                                  |
| CYP2C9 inhibitor                            | Yes                                  |
| CYP2D6 inhibitor                            | No                                   |
| CYP3A4 inhibitor                            | No                                   |
| Log <i>K</i> <sub>p</sub> (skin permeation) | -4.67 cm/s                           |
| Druglikeness                                |                                      |
| Lipinski                                    | Yes; 0 violation                     |
| Ghose                                       | Yes                                  |
| Veber                                       | Yes                                  |
| Egan                                        | Yes                                  |
| Muegge                                      | No; 1 violation: Heteroatoms<2       |
| Bioavailability Score                       | 0.55                                 |
| Medicinal Chemistry                         |                                      |
| PAINS                                       | 0 alert                              |
| Brenk                                       | 1 alert: isolated_alkene             |
| Leadlikeness                                | No; 2 violations: MW<250, XLOGP3>3.5 |
| Synthetic accessibility                     | 3.28                                 |

Figure S3 Chemico-physical and pharmacokinetic properties predicted for  $\beta$ -costol.

farnesal

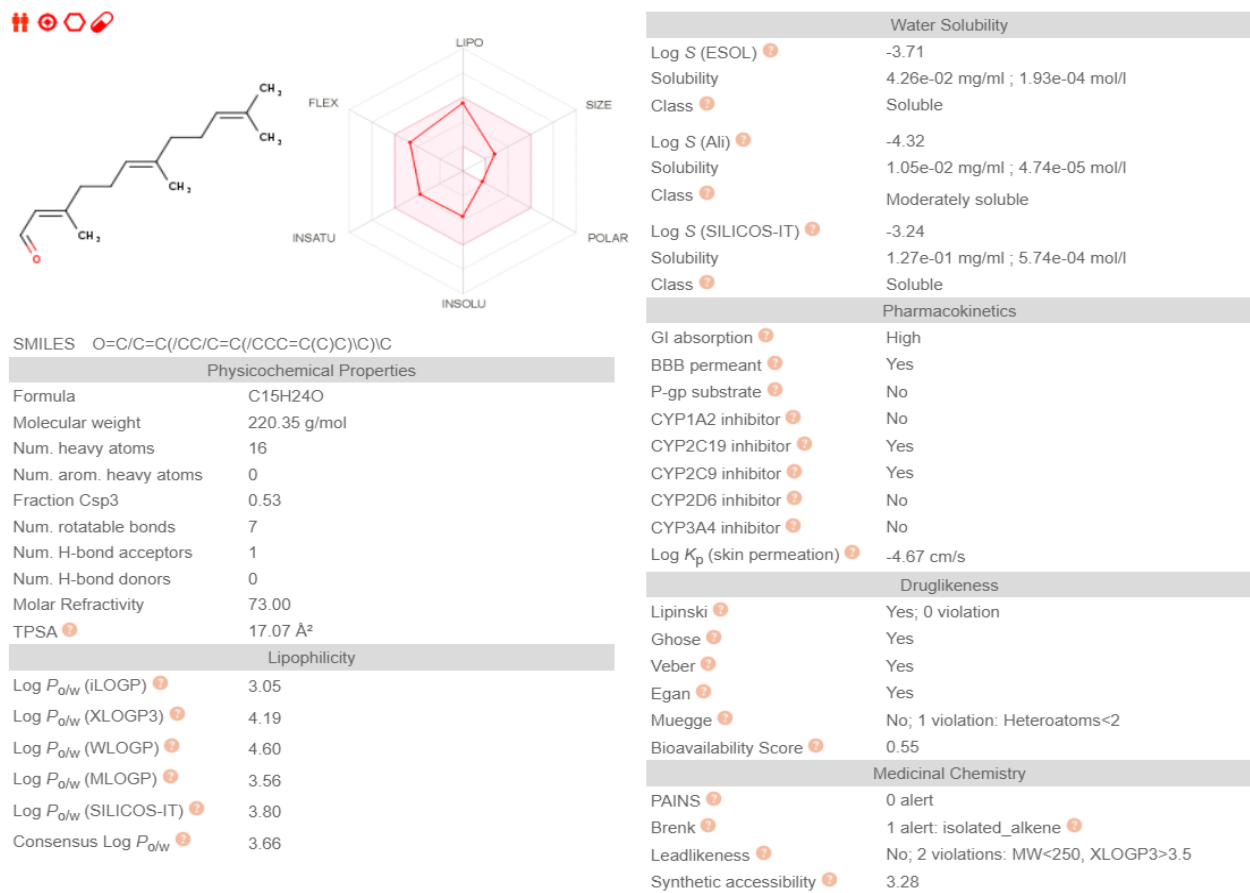

Figure S4 Chemico-physical and pharmacokinetic properties predicted for farnesal.

(Z,E)-α-farnesene

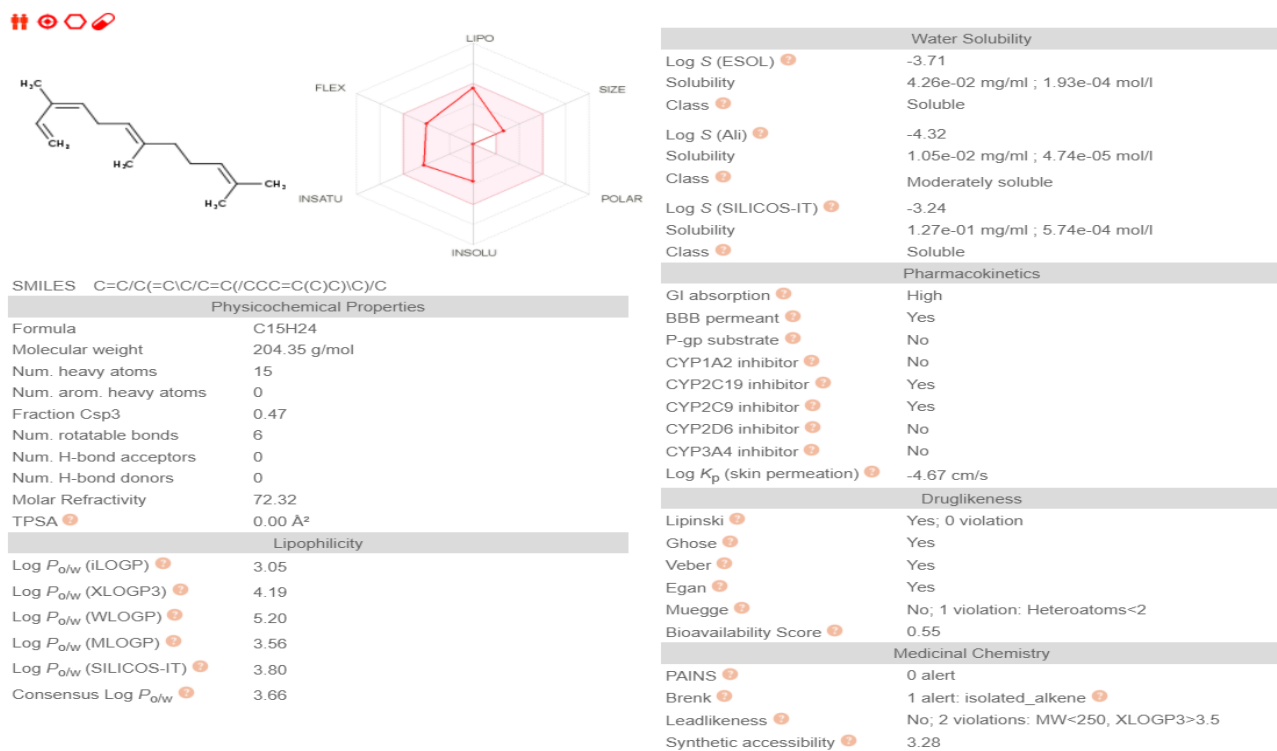

Figure S5 Chemico-physical and pharmacokinetic properties predicted for (Z,E)-α-farnesene.

## (E)-4,8-dimethyl-1,3,7-nonatriene

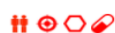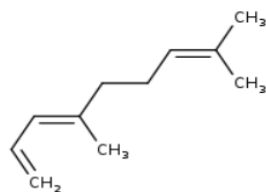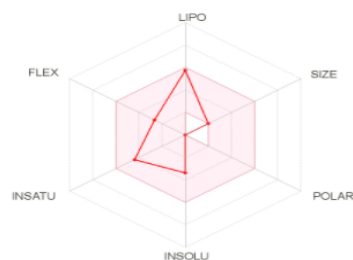

SMILES C=C/C=C(/CCC=C(C)C)C

| Physicochemical Properties               |                                 |
|------------------------------------------|---------------------------------|
| Formula                                  | C <sub>11</sub> H <sub>18</sub> |
| Molecular weight                         | 150.26 g/mol                    |
| Num. heavy atoms                         | 11                              |
| Num. arom. heavy atoms                   | 0                               |
| Fraction Csp <sup>3</sup>                | 0.45                            |
| Num. rotatable bonds                     | 4                               |
| Num. H-bond acceptors                    | 0                               |
| Num. H-bond donors                       | 0                               |
| Molar Refractivity                       | 53.57                           |
| TPSA                                     | 0.00 Å <sup>2</sup>             |
| Lipophilicity                            |                                 |
| Log <i>P</i> <sub>o/w</sub> (iLOGP)      | 3.16                            |
| Log <i>P</i> <sub>o/w</sub> (XLOGP3)     | 4.56                            |
| Log <i>P</i> <sub>o/w</sub> (WLOGP)      | 3.87                            |
| Log <i>P</i> <sub>o/w</sub> (MLOGP)      | 3.85                            |
| Log <i>P</i> <sub>o/w</sub> (SILICOS-IT) | 3.32                            |
| Consensus Log <i>P</i> <sub>o/w</sub>    | 3.75                            |

| Water Solubility                            |                                         |
|---------------------------------------------|-----------------------------------------|
| Log <i>S</i> (ESOL)                         | -3.38                                   |
| Solubility                                  | 6.26e-02 mg/ml ; 4.16e-04 mol/l         |
| Class                                       | Soluble                                 |
| Log <i>S</i> (Ali)                          | -4.28                                   |
| Solubility                                  | 7.83e-03 mg/ml ; 5.21e-05 mol/l         |
| Class                                       | Moderately soluble                      |
| Log <i>S</i> (SILICOS-IT)                   | -2.46                                   |
| Solubility                                  | 5.23e-01 mg/ml ; 3.48e-03 mol/l         |
| Class                                       | Soluble                                 |
| Pharmacokinetics                            |                                         |
| GI absorption                               | Low                                     |
| BBB permeant                                | Yes                                     |
| P-gp substrate                              | No                                      |
| CYP1A2 inhibitor                            | No                                      |
| CYP2C19 inhibitor                           | No                                      |
| CYP2C9 inhibitor                            | No                                      |
| CYP2D6 inhibitor                            | No                                      |
| CYP3A4 inhibitor                            | No                                      |
| Log <i>K</i> <sub>p</sub> (skin permeation) | -3.98 cm/s                              |
| Druglikeness                                |                                         |
| Lipinski                                    | Yes; 0 violation                        |
| Ghose                                       | No; 1 violation: MW<160                 |
| Veber                                       | Yes                                     |
| Egan                                        | Yes                                     |
| Muegge                                      | No; 2 violations: MW<200, Heteroatoms<2 |
| Bioavailability Score                       | 0.55                                    |
| Medicinal Chemistry                         |                                         |
| PAINS                                       | 0 alert                                 |
| Brenk                                       | 2 alerts: isolated_alkene, polyene      |
| Leadlikeness                                | No; 2 violations: MW<250, XLOGP3>3.5    |
| Synthetic accessibility                     | 3.27                                    |

**Figure S6** Chemico-physical and pharmacokinetic properties predicted for (E)-4,8-dimethyl-1,3,7-nonatriene.

## (Z)-linalool oxide

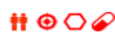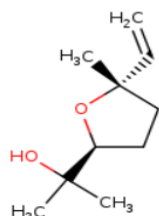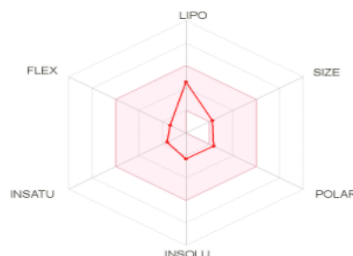

SMILES C=C[C@]1(C)CC[C@H](O1)C(O)(C)C

| Physicochemical Properties               |                                                |
|------------------------------------------|------------------------------------------------|
| Formula                                  | C <sub>10</sub> H <sub>18</sub> O <sub>2</sub> |
| Molecular weight                         | 170.25 g/mol                                   |
| Num. heavy atoms                         | 12                                             |
| Num. arom. heavy atoms                   | 0                                              |
| Fraction Csp <sup>3</sup>                | 0.80                                           |
| Num. rotatable bonds                     | 2                                              |
| Num. H-bond acceptors                    | 2                                              |
| Num. H-bond donors                       | 1                                              |
| Molar Refractivity                       | 49.92                                          |
| TPSA                                     | 29.46 Å <sup>2</sup>                           |
| Lipophilicity                            |                                                |
| Log <i>P</i> <sub>o/w</sub> (iLOGP)      | 2.44                                           |
| Log <i>P</i> <sub>o/w</sub> (XLOGP3)     | 2.43                                           |
| Log <i>P</i> <sub>o/w</sub> (WLOGP)      | 1.88                                           |
| Log <i>P</i> <sub>o/w</sub> (MLOGP)      | 1.38                                           |
| Log <i>P</i> <sub>o/w</sub> (SILICOS-IT) | 2.10                                           |
| Consensus Log <i>P</i> <sub>o/w</sub>    | 2.05                                           |

| Water Solubility                            |                                 |
|---------------------------------------------|---------------------------------|
| Log <i>S</i> (ESOL)                         | -2.29                           |
| Solubility                                  | 8.64e-01 mg/ml ; 5.08e-03 mol/l |
| Class                                       | Soluble                         |
| Log <i>S</i> (Ali)                          | -2.69                           |
| Solubility                                  | 3.46e-01 mg/ml ; 2.03e-03 mol/l |
| Class                                       | Soluble                         |
| Log <i>S</i> (SILICOS-IT)                   | -1.56                           |
| Solubility                                  | 4.66e+00 mg/ml ; 2.74e-02 mol/l |
| Class                                       | Soluble                         |
| Pharmacokinetics                            |                                 |
| GI absorption                               | High                            |
| BBB permeant                                | Yes                             |
| P-gp substrate                              | No                              |
| CYP1A2 inhibitor                            | No                              |
| CYP2C19 inhibitor                           | No                              |
| CYP2C9 inhibitor                            | No                              |
| CYP2D6 inhibitor                            | No                              |
| CYP3A4 inhibitor                            | No                              |
| Log <i>K</i> <sub>p</sub> (skin permeation) | -5.61 cm/s                      |
| Druglikeness                                |                                 |
| Lipinski                                    | Yes; 0 violation                |
| Ghose                                       | Yes                             |
| Veber                                       | Yes                             |
| Egan                                        | Yes                             |
| Muegge                                      | No; 1 violation: MW<200         |
| Bioavailability Score                       | 0.55                            |
| Medicinal Chemistry                         |                                 |
| PAINS                                       | 0 alert                         |
| Brenk                                       | 1 alert: isolated_alkene        |
| Leadlikeness                                | No; 1 violation: MW<250         |
| Synthetic accessibility                     | 3.20                            |

**Figure S7** Chemico-physical and pharmacokinetic properties predicted for (Z)-linalool oxide.

# sesquirosefuran

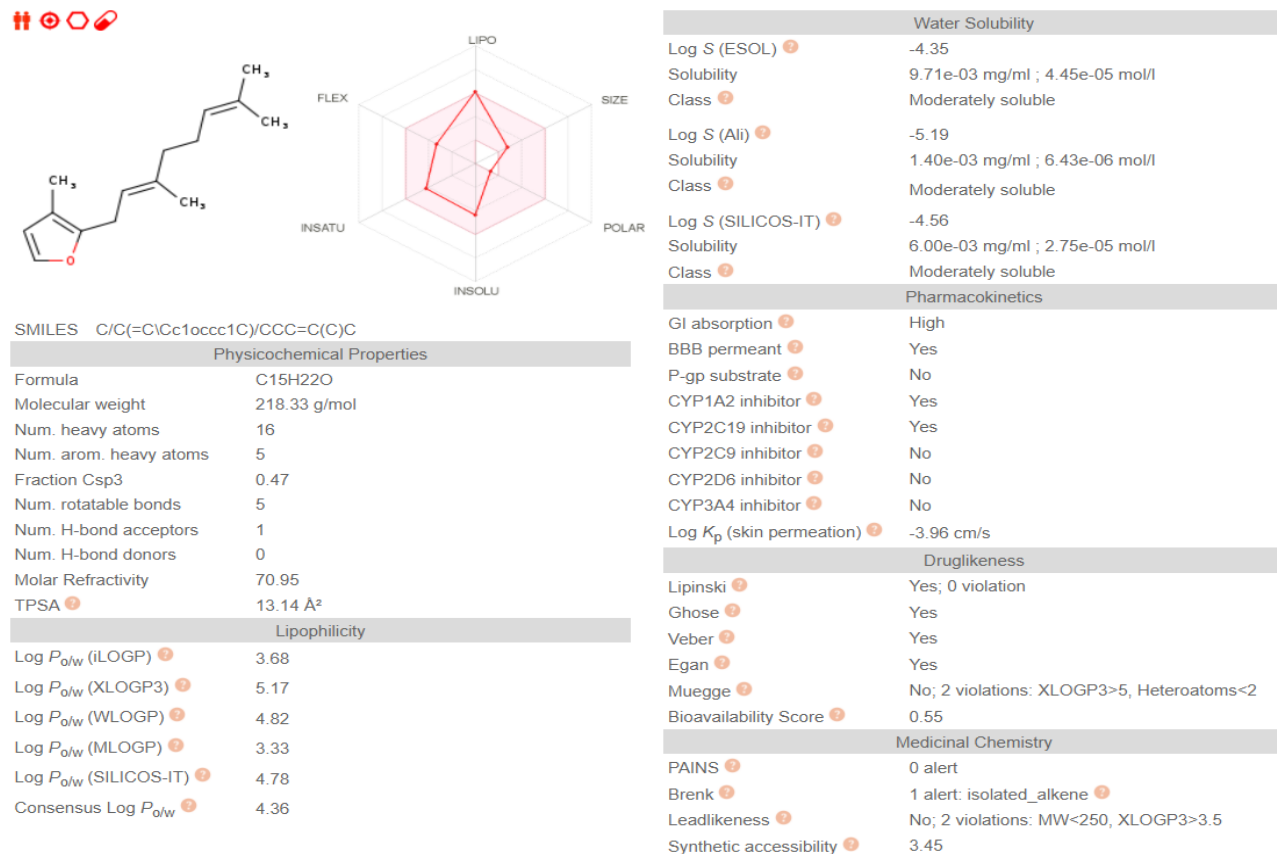

Figure S8 Chemico-physical and pharmacokinetic properties predicted for sesquirosefuran.

# nonanal

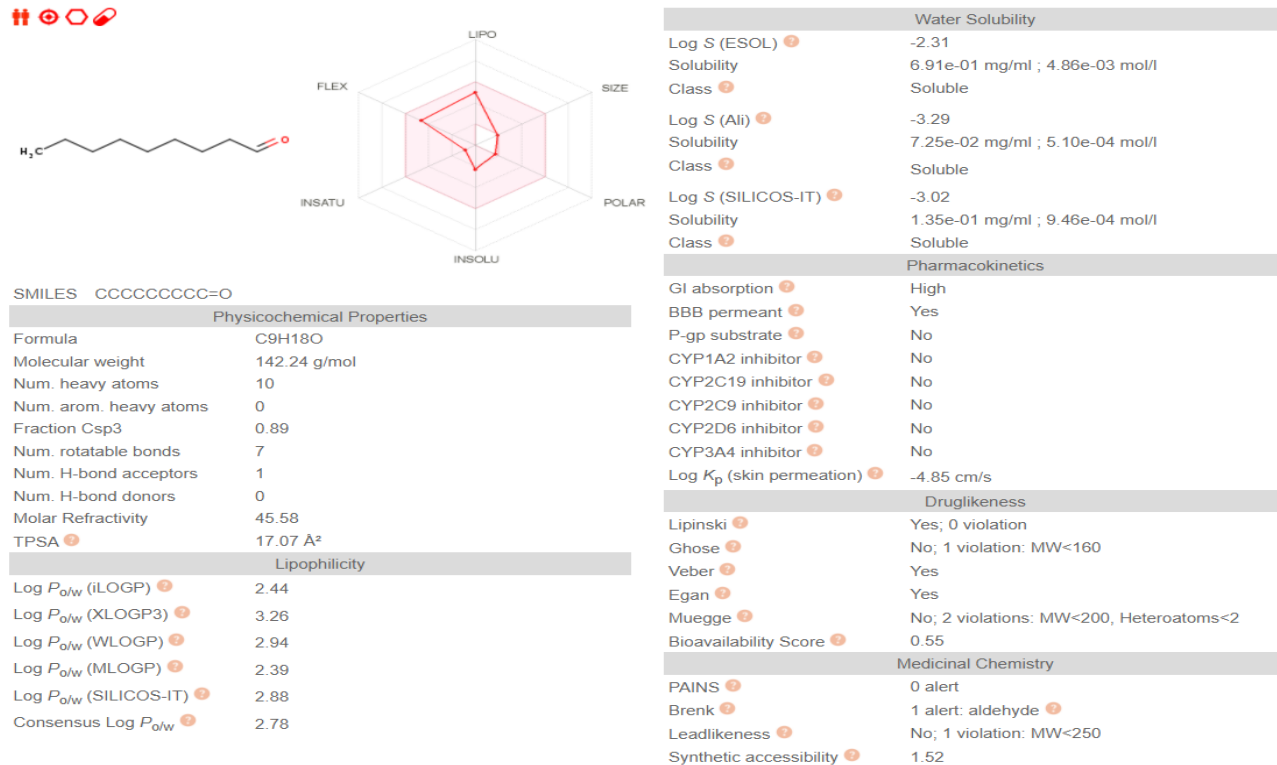

Figure S9 Chemico-physical and pharmacokinetic properties predicted for nonanal.

## 2-methyl-1-hepten-6-one

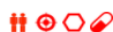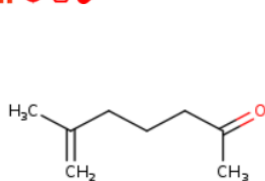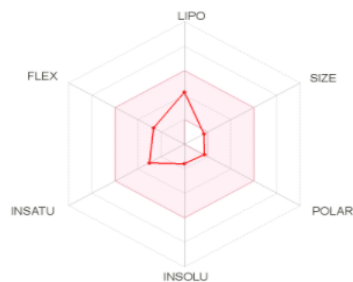

SMILES CC(=C)CCCC(=O)C

### Physicochemical Properties

|                        |              |
|------------------------|--------------|
| Formula                | C8H14O       |
| Molecular weight       | 126.20 g/mol |
| Num. heavy atoms       | 9            |
| Num. arom. heavy atoms | 0            |
| Fraction Csp3          | 0.62         |
| Num. rotatable bonds   | 4            |
| Num. H-bond acceptors  | 1            |
| Num. H-bond donors     | 0            |
| Molar Refractivity     | 40.30        |
| TPSA                   | 17.07 Å²     |

### Lipophilicity

|                           |      |
|---------------------------|------|
| Log $P_{ow}$ (iLOGP)      | 2.14 |
| Log $P_{ow}$ (XLOGP3)     | 1.97 |
| Log $P_{ow}$ (WLOGP)      | 2.32 |
| Log $P_{ow}$ (MLOGP)      | 1.97 |
| Log $P_{ow}$ (SILICOS-IT) | 2.13 |
| Consensus Log $P_{ow}$    | 2.11 |

| Water Solubility            |                                         |
|-----------------------------|-----------------------------------------|
| Log S (ESOL)                | -1.60                                   |
| Solubility                  | 3.17e+00 mg/ml ; 2.51e-02 mol/l         |
| Class                       | Very soluble                            |
| Log S (Ali)                 | -1.95                                   |
| Solubility                  | 1.40e+00 mg/ml ; 1.11e-02 mol/l         |
| Class                       | Very soluble                            |
| Log S (SILICOS-IT)          | -2.22                                   |
| Solubility                  | 7.57e-01 mg/ml ; 6.00e-03 mol/l         |
| Class                       | Soluble                                 |
| Pharmacokinetics            |                                         |
| GI absorption               | High                                    |
| BBB permeant                | Yes                                     |
| P-gp substrate              | No                                      |
| CYP1A2 inhibitor            | No                                      |
| CYP2C19 inhibitor           | No                                      |
| CYP2C9 inhibitor            | No                                      |
| CYP2D6 inhibitor            | No                                      |
| CYP3A4 inhibitor            | No                                      |
| Log $K_p$ (skin permeation) | -5.67 cm/s                              |
| Druglikeness                |                                         |
| Lipinski                    | Yes; 0 violation                        |
| Ghose                       | No; 1 violation: MW<160                 |
| Veber                       | Yes                                     |
| Egan                        | Yes                                     |
| Muegge                      | No; 2 violations: MW<200, Heteroatoms<2 |
| Bioavailability Score       | 0.55                                    |
| Medicinal Chemistry         |                                         |
| PAINS                       | 0 alert                                 |
| Brenk                       | 1 alert: isolated_alkene                |
| Leadlikeness                | No; 1 violation: MW<250                 |
| Synthetic accessibility     | 1.80                                    |

Figure S10 Chemico-physical and pharmacokinetic properties predicted for 2-methyl-1-hepten-6-one.

## $\alpha$ -pinene

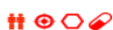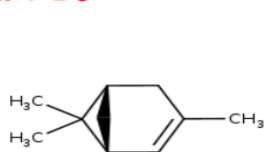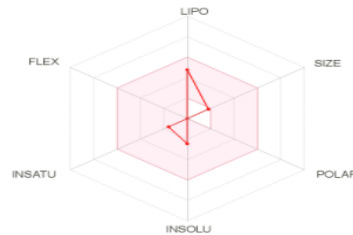

SMILES CC1=C[C@H]2C[C@@H](C1)C2(C)C

### Physicochemical Properties

|                        |              |
|------------------------|--------------|
| Formula                | C10H16       |
| Molecular weight       | 136.23 g/mol |
| Num. heavy atoms       | 10           |
| Num. arom. heavy atoms | 0            |
| Fraction Csp3          | 0.80         |
| Num. rotatable bonds   | 0            |
| Num. H-bond acceptors  | 0            |
| Num. H-bond donors     | 0            |
| Molar Refractivity     | 45.22        |
| TPSA                   | 0.00 Å²      |

### Lipophilicity

|                           |      |
|---------------------------|------|
| Log $P_{ow}$ (iLOGP)      | 2.63 |
| Log $P_{ow}$ (XLOGP3)     | 2.85 |
| Log $P_{ow}$ (WLOGP)      | 3.00 |
| Log $P_{ow}$ (MLOGP)      | 4.29 |
| Log $P_{ow}$ (SILICOS-IT) | 2.79 |
| Consensus Log $P_{ow}$    | 3.11 |

| Water Solubility            |                                         |
|-----------------------------|-----------------------------------------|
| Log S (ESOL)                | -2.48                                   |
| Solubility                  | 4.51e-01 mg/ml ; 3.31e-03 mol/l         |
| Class                       | Soluble                                 |
| Log S (Ali)                 | -2.51                                   |
| Solubility                  | 4.22e-01 mg/ml ; 3.10e-03 mol/l         |
| Class                       | Soluble                                 |
| Log S (SILICOS-IT)          | -2.23                                   |
| Solubility                  | 8.06e-01 mg/ml ; 5.92e-03 mol/l         |
| Class                       | Soluble                                 |
| Pharmacokinetics            |                                         |
| GI absorption               | Low                                     |
| BBB permeant                | Yes                                     |
| P-gp substrate              | No                                      |
| CYP1A2 inhibitor            | No                                      |
| CYP2C19 inhibitor           | No                                      |
| CYP2C9 inhibitor            | No                                      |
| CYP2D6 inhibitor            | No                                      |
| CYP3A4 inhibitor            | No                                      |
| Log $K_p$ (skin permeation) | -5.11 cm/s                              |
| Druglikeness                |                                         |
| Lipinski                    | Yes; 1 violation: MLOGP>4.15            |
| Ghose                       | No; 1 violation: MW<160                 |
| Veber                       | Yes                                     |
| Egan                        | Yes                                     |
| Muegge                      | No; 2 violations: MW<200, Heteroatoms<2 |
| Bioavailability Score       | 0.55                                    |
| Medicinal Chemistry         |                                         |
| PAINS                       | 0 alert                                 |
| Brenk                       | 1 alert: isolated_alkene                |
| Leadlikeness                | No; 1 violation: MW<250                 |
| Synthetic accessibility     | 4.44                                    |

Figure S11 Chemico-physical and pharmacokinetic properties predicted for  $\alpha$ -pinene.

isodecyl alcohol

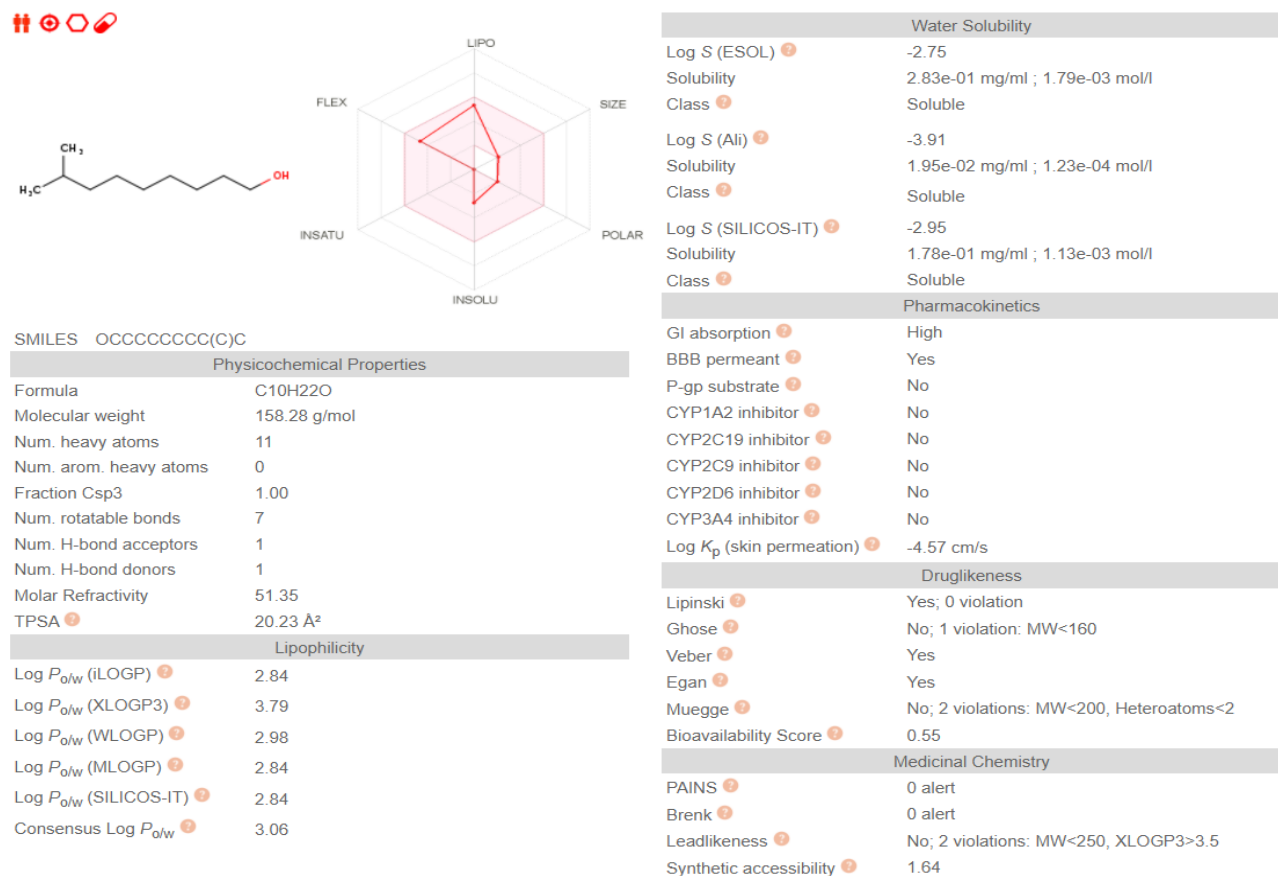

Figure S12 Chemico-physical and pharmacokinetic properties predicted for isodecyl alcohol.

butyric acid, 4-tridecyl ester

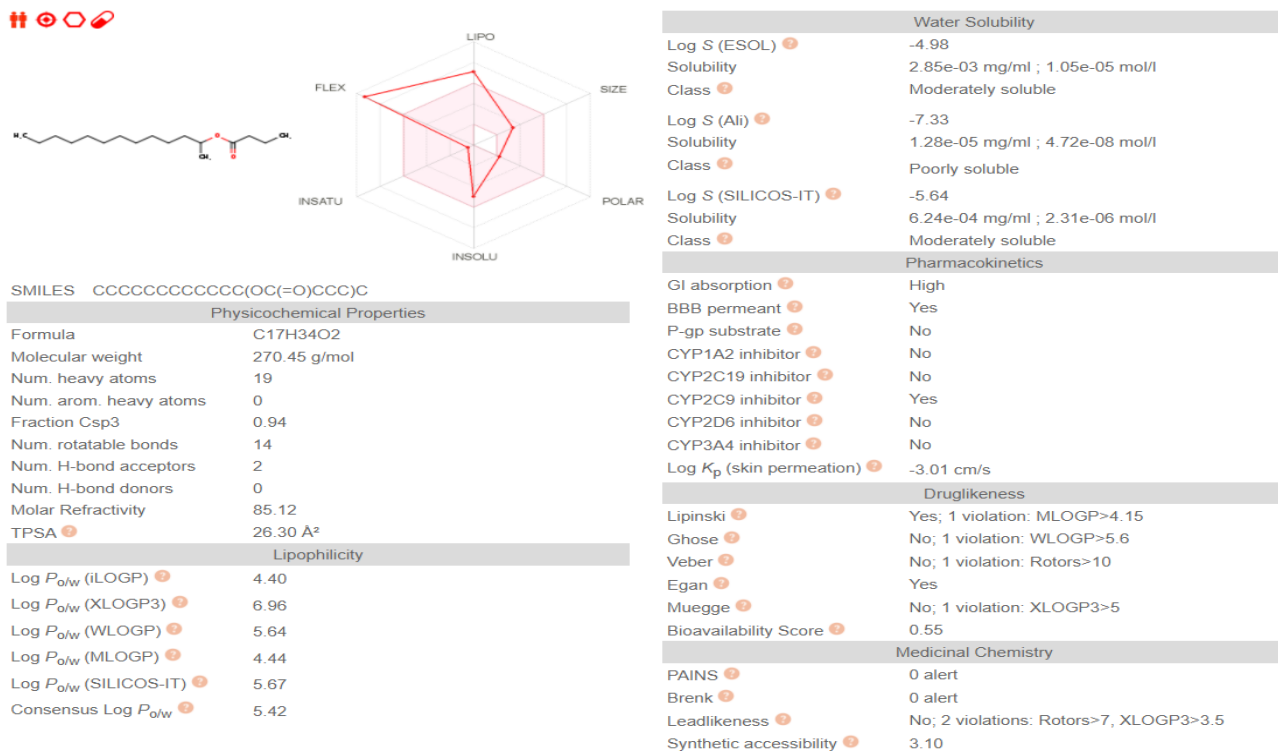

Figure S13 Chemico-physical and pharmacokinetic properties predicted for butyric acid, 4-tridecyl ester.



## umbelliferone

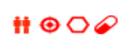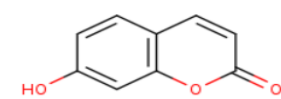

SMILES Oc1ccc2c(c1)oc(=O)cc2

| Physicochemical Properties               |                                              |
|------------------------------------------|----------------------------------------------|
| Formula                                  | C <sub>9</sub> H <sub>6</sub> O <sub>3</sub> |
| Molecular weight                         | 162.14 g/mol                                 |
| Num. heavy atoms                         | 12                                           |
| Num. arom. heavy atoms                   | 10                                           |
| Fraction Csp <sup>3</sup>                | 0.00                                         |
| Num. rotatable bonds                     | 0                                            |
| Num. H-bond acceptors                    | 3                                            |
| Num. H-bond donors                       | 1                                            |
| Molar Refractivity                       | 44.51                                        |
| TPSA                                     | 50.44 Å <sup>2</sup>                         |
| Lipophilicity                            |                                              |
| Log <i>P</i> <sub>o/w</sub> (iLOGP)      | 1.44                                         |
| Log <i>P</i> <sub>o/w</sub> (XLOGP3)     | 1.58                                         |
| Log <i>P</i> <sub>o/w</sub> (WLOGP)      | 1.50                                         |
| Log <i>P</i> <sub>o/w</sub> (MLOGP)      | 1.04                                         |
| Log <i>P</i> <sub>o/w</sub> (SILICOS-IT) | 1.97                                         |
| Consensus Log <i>P</i> <sub>o/w</sub>    | 1.51                                         |

| Water Solubility                            |                                 |
|---------------------------------------------|---------------------------------|
| Log <i>S</i> (ESOL)                         | -2.46                           |
| Solubility                                  | 5.66e-01 mg/ml ; 3.49e-03 mol/l |
| Class                                       | Soluble                         |
| Log <i>S</i> (Ali)                          | -2.25                           |
| Solubility                                  | 9.12e-01 mg/ml ; 5.62e-03 mol/l |
| Class                                       | Soluble                         |
| Log <i>S</i> (SILICOS-IT)                   | -3.03                           |
| Solubility                                  | 1.53e-01 mg/ml ; 9.42e-04 mol/l |
| Class                                       | Soluble                         |
| Pharmacokinetics                            |                                 |
| GI absorption                               | High                            |
| BBB permeant                                | Yes                             |
| P-gp substrate                              | No                              |
| CYP1A2 inhibitor                            | Yes                             |
| CYP2C19 inhibitor                           | No                              |
| CYP2C9 inhibitor                            | No                              |
| CYP2D6 inhibitor                            | No                              |
| CYP3A4 inhibitor                            | No                              |
| Log <i>K</i> <sub>p</sub> (skin permeation) | -6.17 cm/s                      |
| Druglikeness                                |                                 |
| Lipinski                                    | Yes; 0 violation                |
| Ghose                                       | No; 1 violation: #atoms<20      |
| Veber                                       | Yes                             |
| Egan                                        | Yes                             |
| Muegge                                      | No; 1 violation: MW<200         |
| Bioavailability Score                       | 0.55                            |
| Medicinal Chemistry                         |                                 |
| PAINS                                       | 0 alert                         |
| Brenk                                       | 1 alert: coumarin               |
| Leadlikeness                                | No; 1 violation: MW<250         |
| Synthetic accessibility                     | 2.56                            |

Figure S14 Chemico-physical and pharmacokinetic properties predicted for umbelliferone.

## eugenol

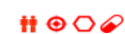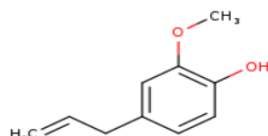

SMILES C=CCc1ccc(OC)c(O)c1

| Physicochemical Properties               |                                                |
|------------------------------------------|------------------------------------------------|
| Formula                                  | C <sub>10</sub> H <sub>12</sub> O <sub>2</sub> |
| Molecular weight                         | 164.20 g/mol                                   |
| Num. heavy atoms                         | 12                                             |
| Num. arom. heavy atoms                   | 6                                              |
| Fraction Csp <sup>3</sup>                | 0.20                                           |
| Num. rotatable bonds                     | 3                                              |
| Num. H-bond acceptors                    | 2                                              |
| Num. H-bond donors                       | 1                                              |
| Molar Refractivity                       | 49.06                                          |
| TPSA                                     | 29.46 Å <sup>2</sup>                           |
| Lipophilicity                            |                                                |
| Log <i>P</i> <sub>o/w</sub> (iLOGP)      | 2.37                                           |
| Log <i>P</i> <sub>o/w</sub> (XLOGP3)     | 2.27                                           |
| Log <i>P</i> <sub>o/w</sub> (WLOGP)      | 2.13                                           |
| Log <i>P</i> <sub>o/w</sub> (MLOGP)      | 2.01                                           |
| Log <i>P</i> <sub>o/w</sub> (SILICOS-IT) | 2.48                                           |
| Consensus Log <i>P</i> <sub>o/w</sub>    | 2.25                                           |

| Water Solubility                            |                                 |
|---------------------------------------------|---------------------------------|
| Log <i>S</i> (ESOL)                         | -2.46                           |
| Solubility                                  | 5.69e-01 mg/ml ; 3.47e-03 mol/l |
| Class                                       | Soluble                         |
| Log <i>S</i> (Ali)                          | -2.53                           |
| Solubility                                  | 4.90e-01 mg/ml ; 2.98e-03 mol/l |
| Class                                       | Soluble                         |
| Log <i>S</i> (SILICOS-IT)                   | -2.79                           |
| Solubility                                  | 2.65e-01 mg/ml ; 1.61e-03 mol/l |
| Class                                       | Soluble                         |
| Pharmacokinetics                            |                                 |
| GI absorption                               | High                            |
| BBB permeant                                | Yes                             |
| P-gp substrate                              | No                              |
| CYP1A2 inhibitor                            | Yes                             |
| CYP2C19 inhibitor                           | No                              |
| CYP2C9 inhibitor                            | No                              |
| CYP2D6 inhibitor                            | No                              |
| CYP3A4 inhibitor                            | No                              |
| Log <i>K</i> <sub>p</sub> (skin permeation) | -5.69 cm/s                      |
| Druglikeness                                |                                 |
| Lipinski                                    | Yes; 0 violation                |
| Ghose                                       | Yes                             |
| Veber                                       | Yes                             |
| Egan                                        | Yes                             |
| Muegge                                      | No; 1 violation: MW<200         |
| Bioavailability Score                       | 0.55                            |
| Medicinal Chemistry                         |                                 |
| PAINS                                       | 0 alert                         |
| Brenk                                       | 1 alert: isolated_alkene        |
| Leadlikeness                                | No; 1 violation: MW<250         |
| Synthetic accessibility                     | 1.58                            |

Figure S15 Chemico-physical and pharmacokinetic properties predicted for eugenol.
